# Supplementary material for: Functional evaluation of intracranial atherosclerotic stenosis by pressure ratio measurements
Source: PubMed Central journal article supplement — Heliyon. 2023 Feb 10;9(2):e13527. doi: 10.1016/j.heliyon.2023.e13527 (PMC9958418; doi:10.1016/j.heliyon.2023.e13527), 2023-02-10
Supplement: mmc1.pdf [file mmc1.pdf]

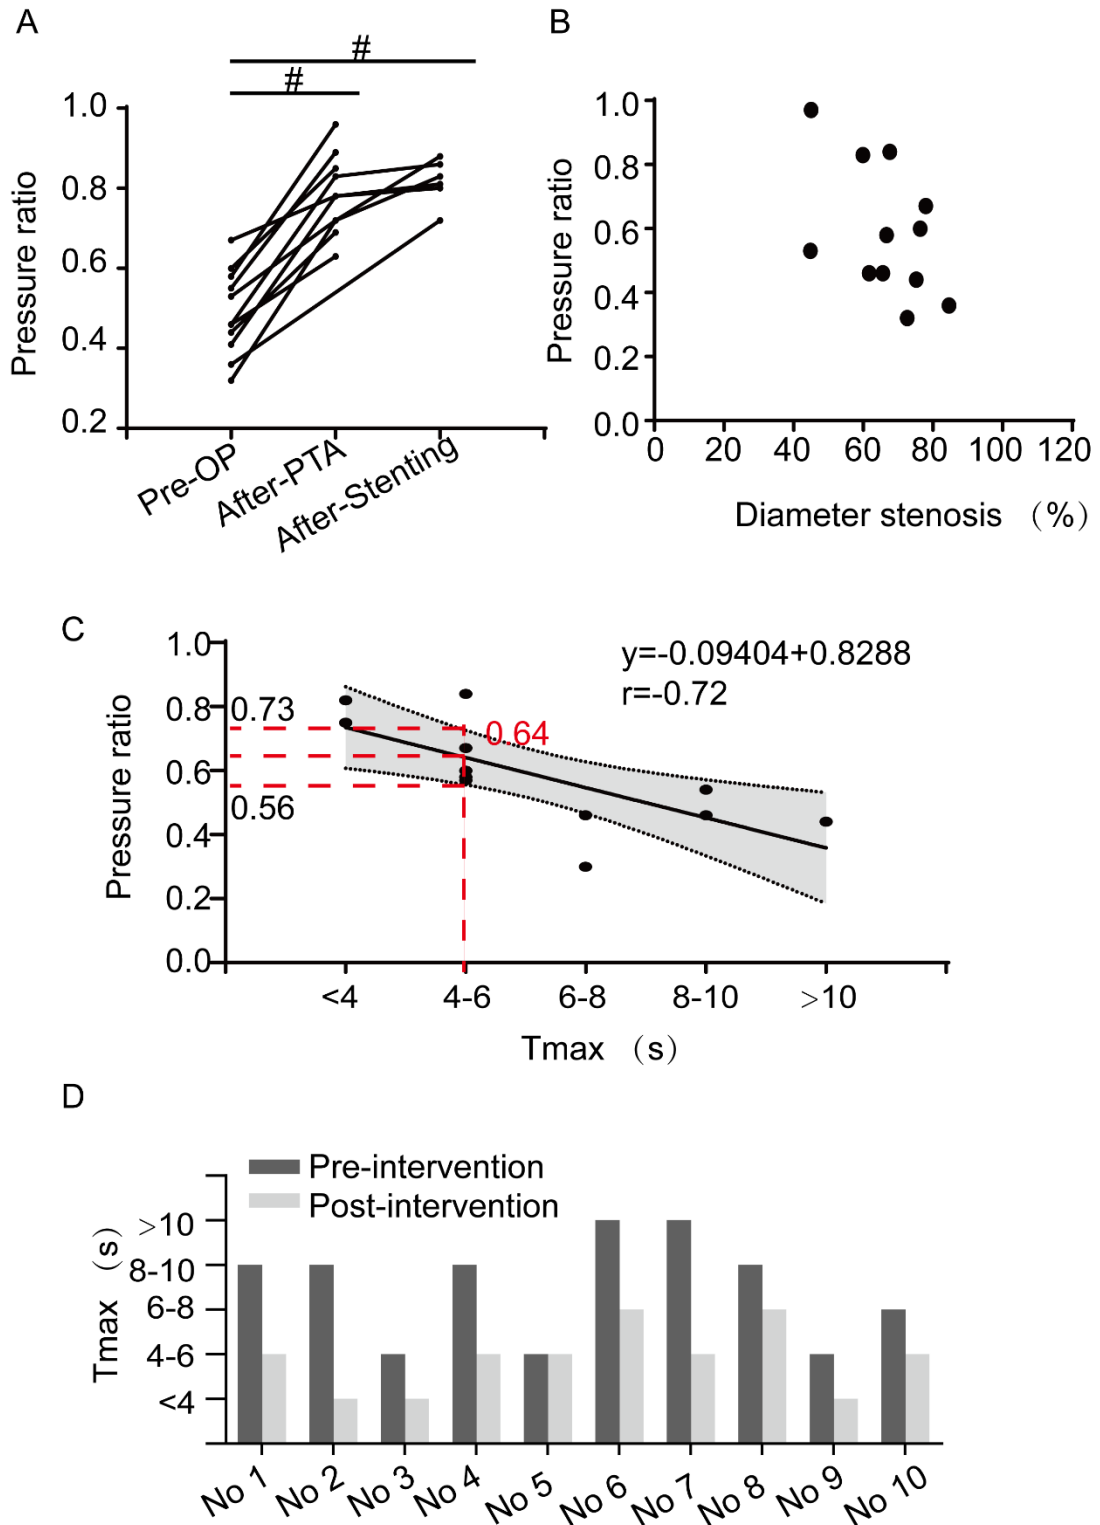

**Figure S2.** **A)** Scatterplot showing PR before the operation, after percutaneous transluminal angioplasty (PTA) and stenting in M1 stenosis. PR increased after PTA and stenting ( $0.79 \pm 0.10$  after PTA,  $0.82 \pm 0.06$  after stenting versus  $0.49 \pm 0.11$  before operation;  $P < 0.01$ ). **B)** Scatterplot showing the relationship between PR and diameter

stenosis in M1 stenosis ( $r=-0.49$ ,  $P=0.11$ ). **C)** Scatterplot showing the relationship between PR and Tmax in M1 stenosis. PR was significantly negatively correlated with Tmax ( $r=-0.72$ ,  $P<0.01$ , Figure 3C). If Tmax > 6 seconds was selected as the intentional indication in our study, we got the cut-off value of PR 0.64 (95% CI: 0.56-0.73). **D)** Tmax pre-intervention and post-intervention. Tmax decreased in most patients (9/10) at 6-month follow-up.
